# Supplementary material for: Near infrared absorption/emission perylenebisimide fluorophores with geometry relaxation-induced large Stokes shift
Source: Royal Society of Chemistry journal article supplement (doi:10.1039/d0ra07050e), 2020-01-01
Supplement: d0ra07050e1.pdf [file d0ra07050e1.pdf]

Electronic Supplementary Information for:

Near infrared absorption/emission Perylenebisimide  
fluorophores with geometry relaxation-induced large Stokes  
shift

Jie Ma,<sup>\*a</sup> Yizhi Zhang,<sup>a</sup> Hongbo Zhang<sup>a</sup> and Xifeng He <sup>a</sup>

Heilongjiang Provincial Key Laboratory of Catalytic Synthesis for Fine Chemicals,  
College of Chemistry and Chemical Engineering, Qiqihar University, Qiqihar 161006,  
P.R.China

E-mail: majie722@126.com

## Index

|                                                                                      |        |
|--------------------------------------------------------------------------------------|--------|
| 1. Synthesis and molecular structure characterization data.....                      | S2-9   |
| 2. Photophysical Properties of <b>P-1</b> , <b>P-2</b> , <b>7</b> and <b>9</b> ..... | S9-10  |
| 3. Cyclic Voltammogram of <b>P-1</b> and <b>P-2</b> .....                            | S11    |
| 4. DFT calculation results.....                                                      | S11-16 |

## 1. Synthesis and molecular structure characterization data

### synthesis of compound HBT, **2** and **3**.

The synthetic procedures of **2** and **3** were according to the reference methods.<sup>1,2</sup>

**2**: <sup>1</sup>H NMR (600 MHz, CDCl<sub>3</sub>): δ 11.11 (s, 1H), 9.85 (s, 1H), 7.71 (d, 1H, *J* = 2.0 Hz), 7.61 (m, 1H), 6.94 (d, 1H, *J* = 8.6 Hz), 0.25 (s, 9H). **3**: <sup>1</sup>H NMR (600 MHz, CDCl<sub>3</sub>): δ 11.11 (s, 1H), 9.87 (s, 1H), 7.73 (d, 1H, *J* = 1.8 Hz), 7.63 (m, 1H), 6.97 (d, 1H, *J* = 8.4 Hz), 3.04 (s, 1H).

### Synthesis of compound **4**.

**2** (100 mg, 0.69 mmol) and 2-aminothiophenol (170 mg, 1.30 mmol) were mixed in methanol (10 mL) and stirred for 6 h at 30 °C. Methanol was evaporated under reduced pressure and the residue was purified by column chromatography (silica gel, petroleum /CH<sub>2</sub>Cl<sub>2</sub>, 3:1, v / v) to give the product as white solid. Yield: 62.2 mg, 36.0%. <sup>1</sup>H NMR (400 MHz, CDCl<sub>3</sub>): δ 8.02 (d, 1H, *J* = 8.4 Hz), 7.95 (d, 1H, *J* = 8.0 Hz), 7.86 (s, 1H), 7.55-7.43 (m, 3H), 7.08 (d, 1H, *J* = 8.4 Hz), 3.07 (s, 1H). TOF HRMS EI+ ([C<sub>15</sub>H<sub>9</sub>NOS]<sup>+</sup>): calcd 251.0405, found 251.0408.

### Synthesis of compound **5**.

The main paragraph text follows directly on here. The mixture of compound **3** (100 mg, 0.40 mmol), K<sub>2</sub>CO<sub>3</sub> (100 mg, 0.72 mmol) and dimethyl formamide (0.50 mL) were stirred at room temperature, then n-butyl bromide (244 mg, 1.80 mmol) was added. The mixture were stirred at 50 °C for 4 h, then the resulting solution was dropwised into ice water and extracted with CH<sub>2</sub>Cl<sub>2</sub>. The organic layer was washed with water for six times and then the organic layer was dried over anhydrous sodium sulfate. The solvent was removed under reduced pressure then the compound was purified by column chromatography (silica gel, petroleum : CH<sub>2</sub>Cl<sub>2</sub>, 1 : 1, v / v) to give the product as white solid. (100 mg, yield: 81.4%). <sup>1</sup>H NMR (400 MHz, CDCl<sub>3</sub>/CD<sub>3</sub>OD): δ 8.73 (s, 1H), 8.11 (d, 1H, *J* = 8.0 Hz), 7.95 (d, 1H, *J* = 8.0 Hz), 7.56 (d, 1H, *J* = 8.8 Hz), 7.52 (t, 1H, *J*<sub>1</sub> = 7.2 Hz, *J*<sub>2</sub> = 8.0 Hz), 7.40 (t, 1H, *J*<sub>1</sub> = 8.0 Hz, *J*<sub>2</sub> = 7.2 Hz), 7.00 (d, 1H, *J* = 8.8 Hz), 4.22 (m, 2H), 3.04 (s, 1H), 1.99–2.04 (m, 2H), 1.61–1.66 (m, 2H), 1.06 (t, 3H, *J* = 7.2 Hz). TOF HRMS EI+ ([C<sub>19</sub>H<sub>17</sub>NOS]<sup>+</sup>): calcd 307.1031, found 307.1031.

### Synthesis of compound 7.

The mixture of **6** (2.0 g, 5.1 mmol), imidazole (10.0 g, 146.9 mmol), and 2-ethylhexylamine (3.8 mL, 21.0 mmol) was stirred under argon atmosphere at 160 °C for 6 h. The mixture was filtered under reduced pressure then the solid was washed with a large amount of water and EtOH. The solid was dried to give dark red solid (2.4 g, yield: 77.0 %). The product was used to next step without further purification.

1. P. Yang, J. Zhao, W. Wu, X. Yu, and Y. Liu, *J. Org. Chem.*, 2012, **77**, 6166–6178.

2. J. Ma, J. Zhao, P. Yang, D. Huang, C. Zhang and Q. Li, *Chem. Commun.*, 2012, **48**, 9720–9722.

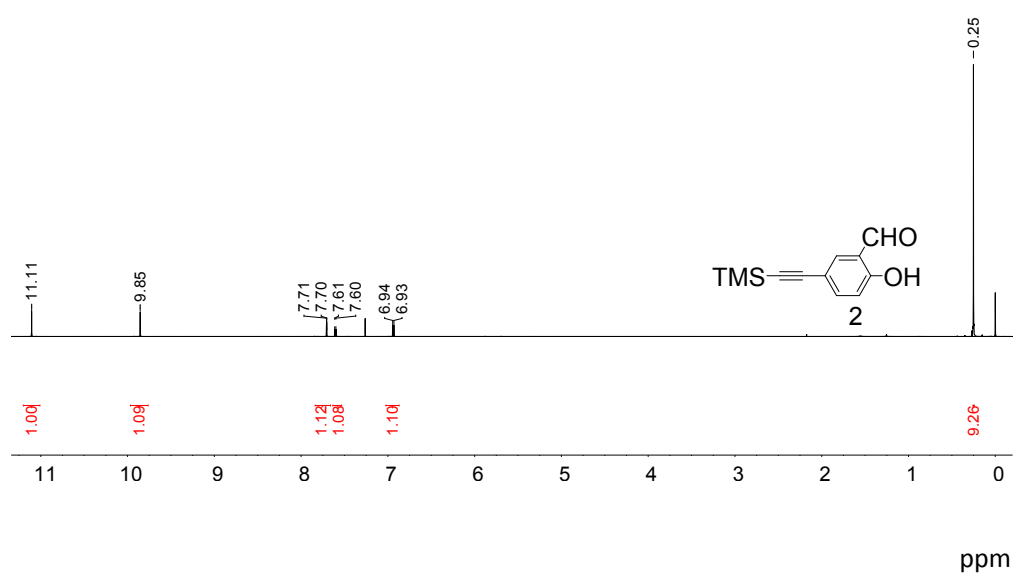

**Fig S1.**  $^1\text{H}$  NMR of compound **2** ( $\text{CDCl}_3$ , 600 MHz).

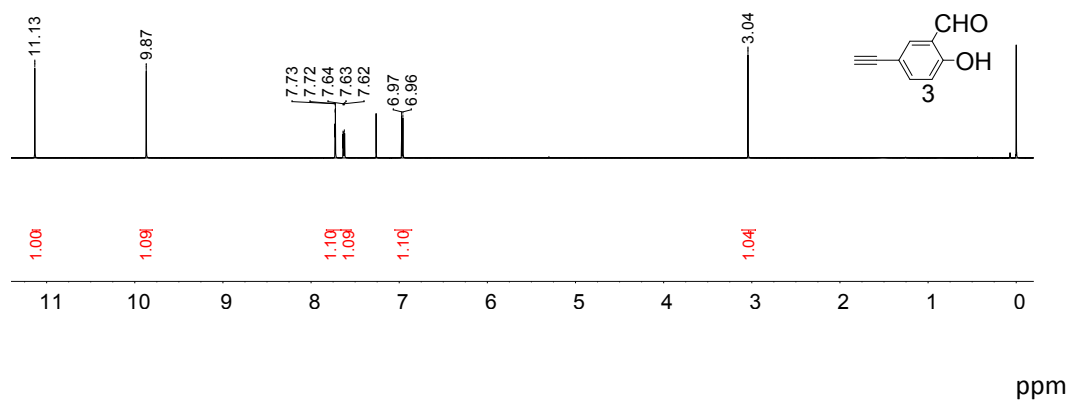

Fig S2.  $^1\text{H}$  NMR of compound **3** ( $\text{CDCl}_3$ , 600 MHz).

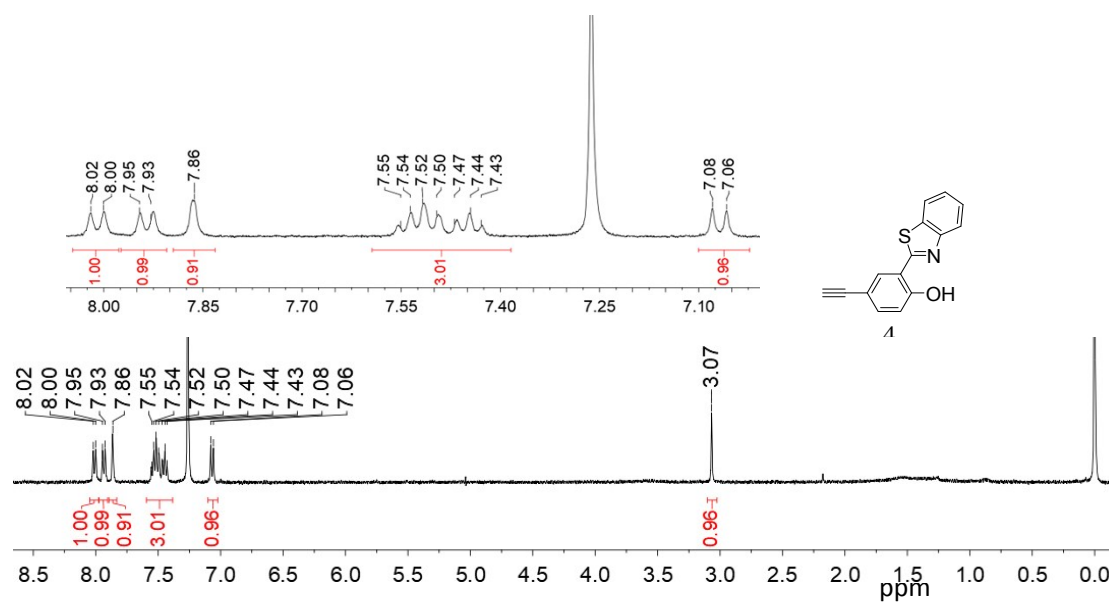

Fig S3. <sup>1</sup>H NMR of compound 4 (CDCl<sub>3</sub>, 400 MHz).

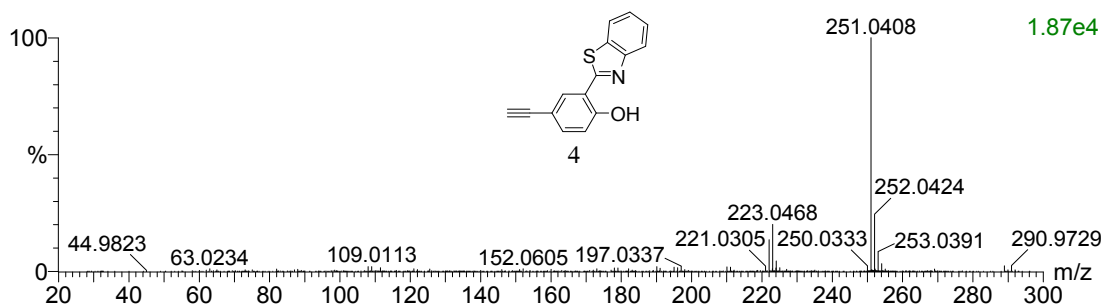

Fig S4. TOF HRMS EI<sup>+</sup> of compound 4.

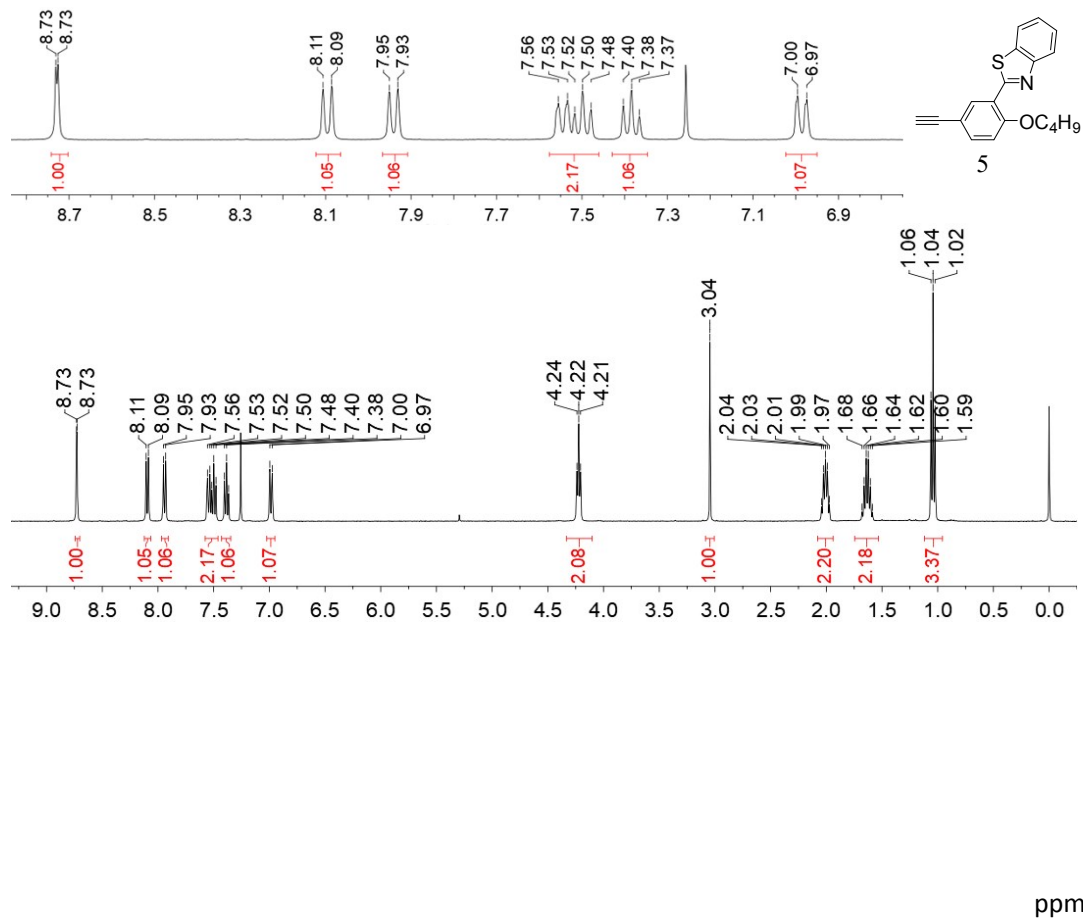

Fig S5. <sup>1</sup>H NMR of compound 5 (CDCl<sub>3</sub>, 400 MHz).

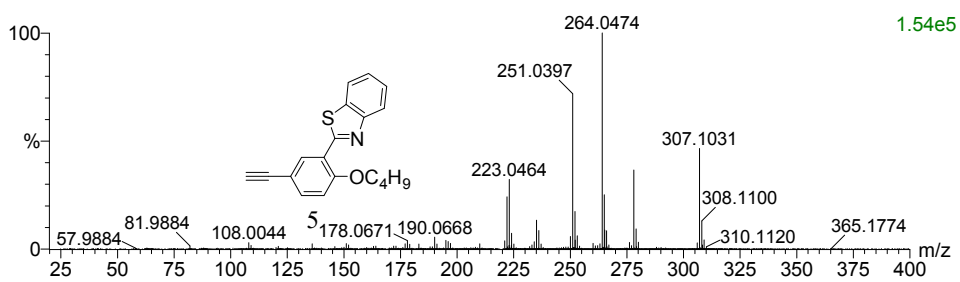

Fig S6. TOF HRMS EI<sup>+</sup> of compound 5

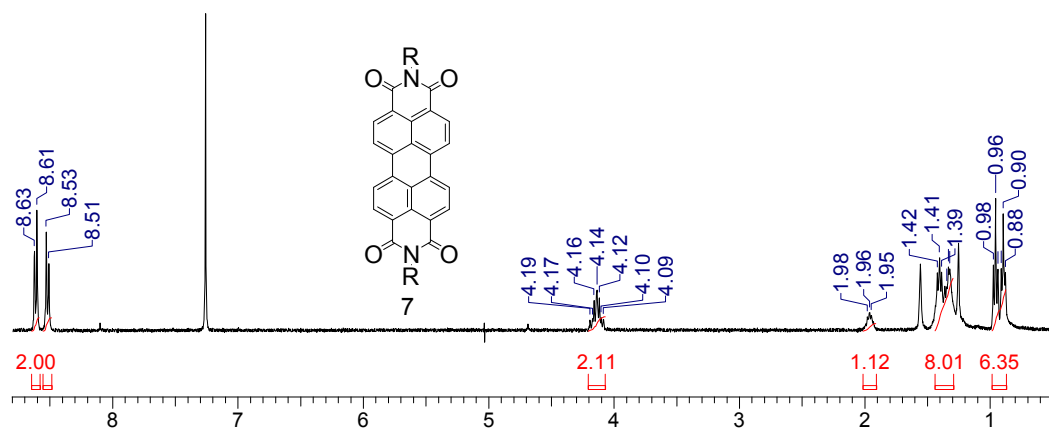

Fig S7. <sup>1</sup>H NMR of compound 7 (CDCl<sub>3</sub>, 600 MHz).

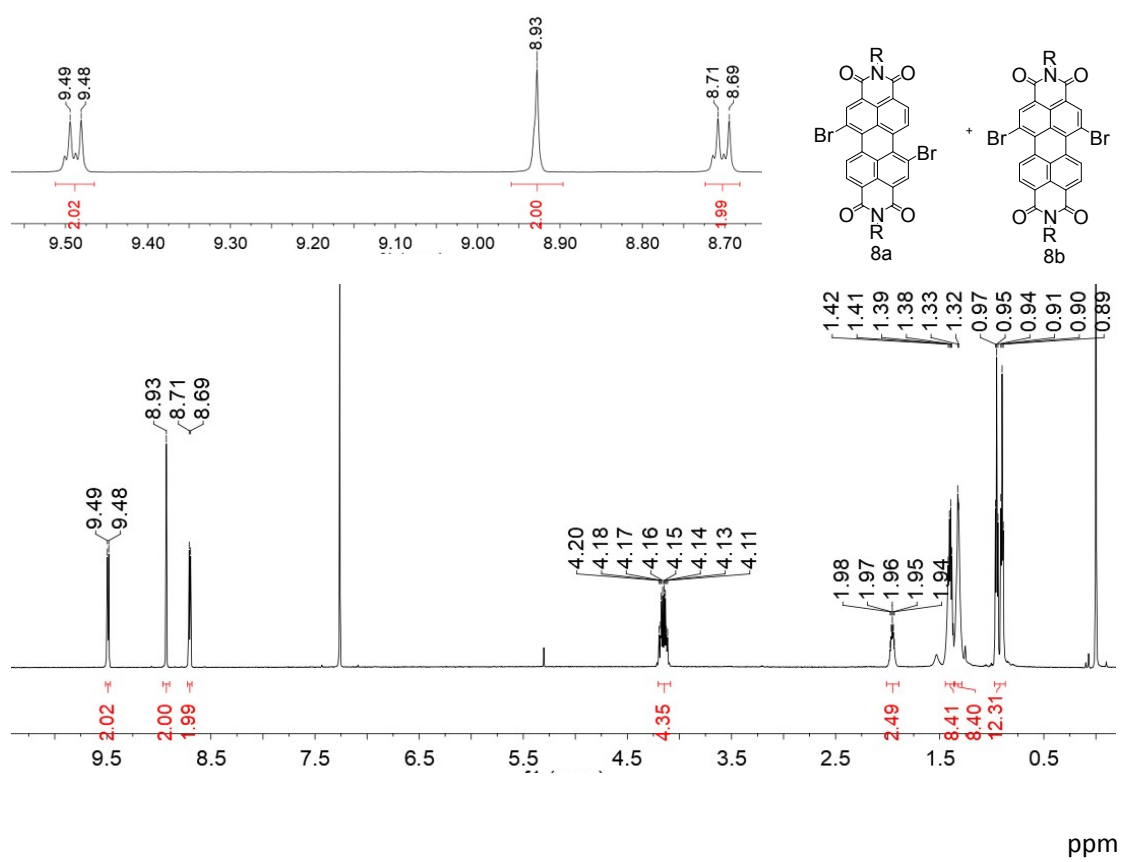

Fig S7.  $^1\text{H}$  NMR of compound **8** ( $\text{CDCl}_3$ , 600 MHz).

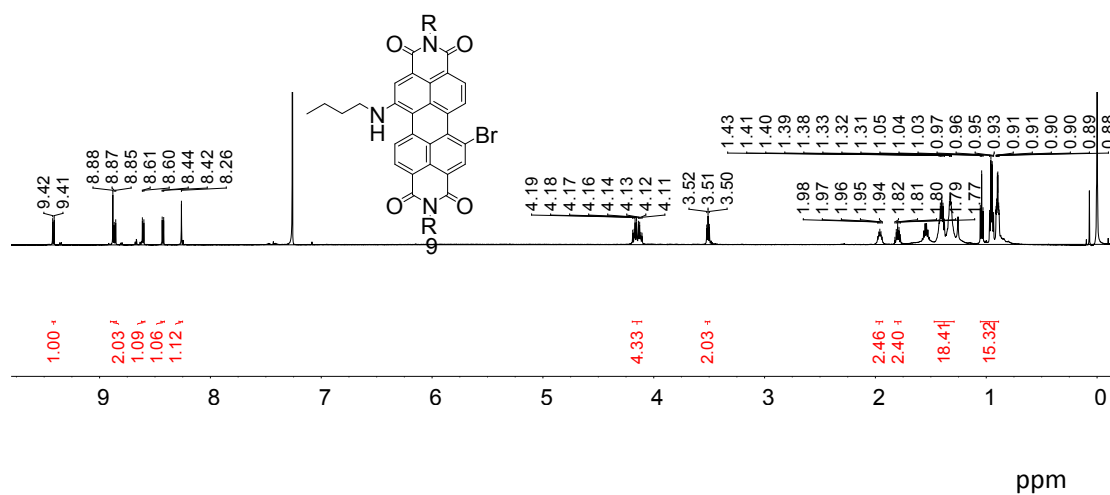

Fig S8.  $^1\text{H}$  NMR of compound 9 ( $\text{CDCl}_3$ , 600 MHz).

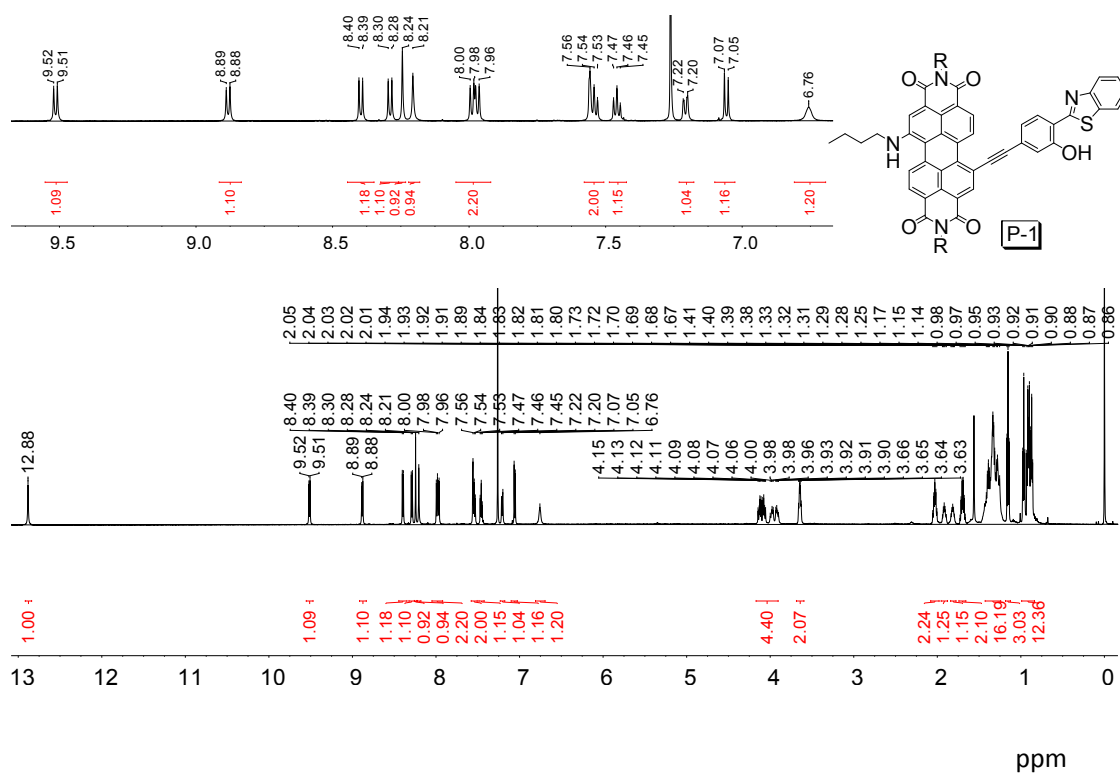

Fig S9.  $^1\text{H}$  NMR of compound P-1 ( $\text{CDCl}_3$ , 600 MHz).



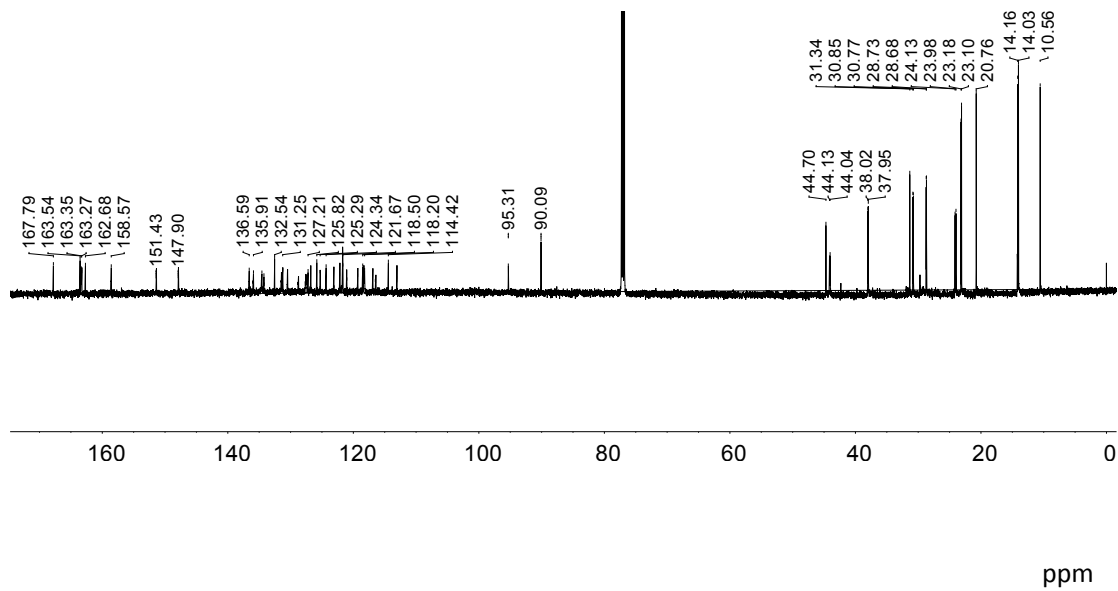

**Fig S10.**  $^{13}\text{C}$  NMR of compound **P-1** ( $\text{CDCl}_3$ , 150 MHz).

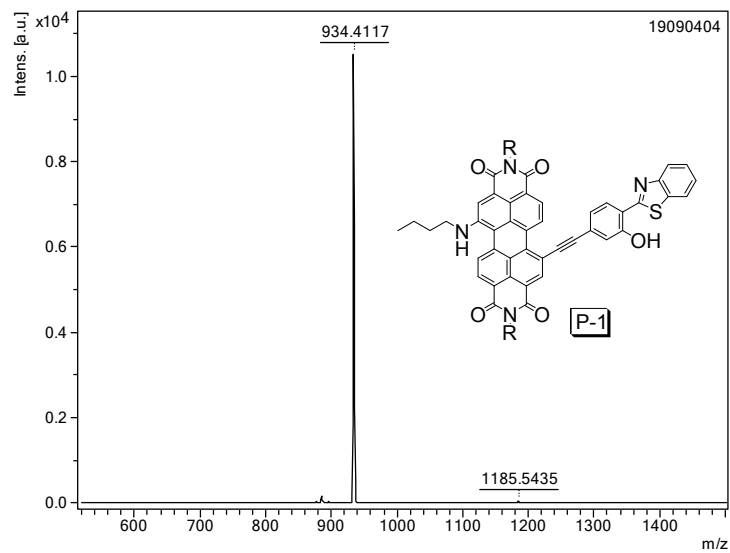

**Fig S11.** MALDI-HRMS of compound **P-1**

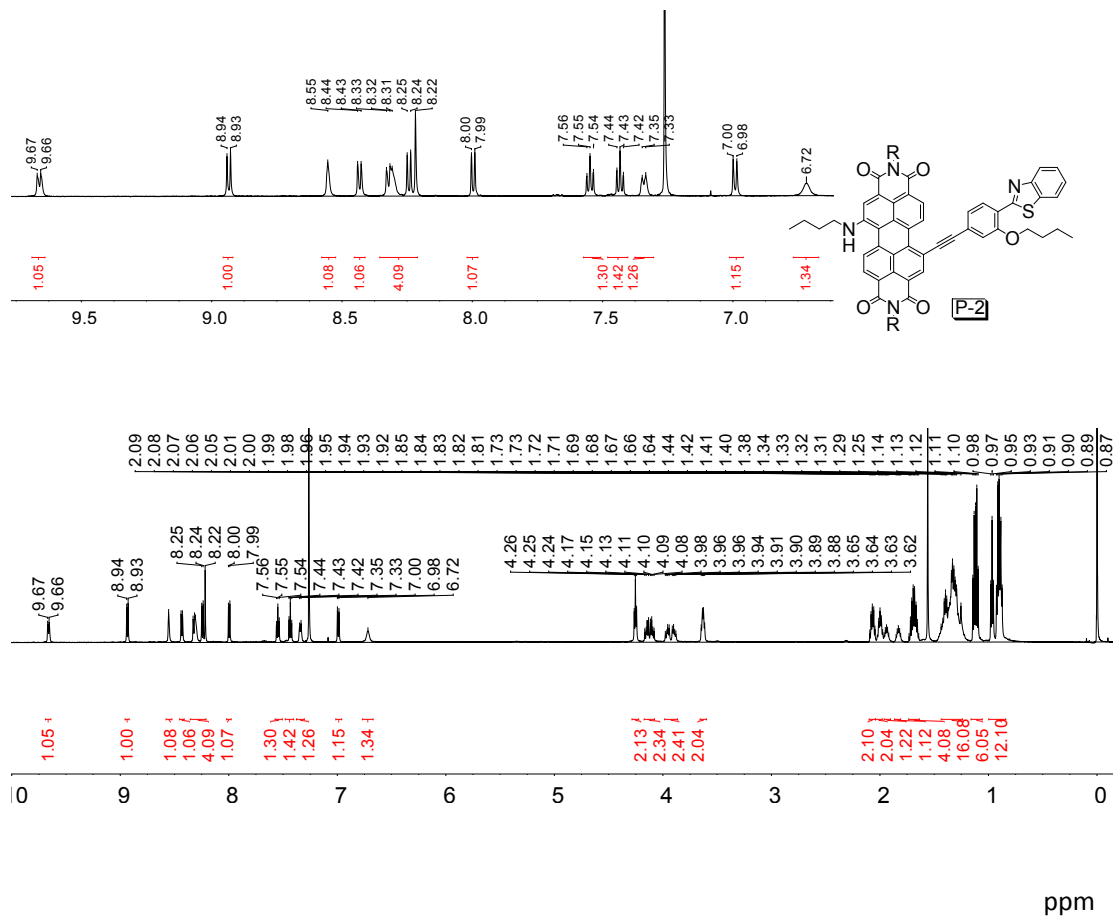

**Fig S12.** <sup>1</sup>H NMR of compound **P-2** (CDCl<sub>3</sub>, 600 MHz).

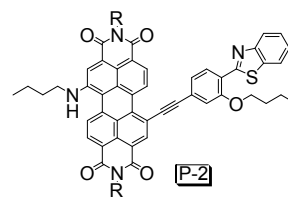

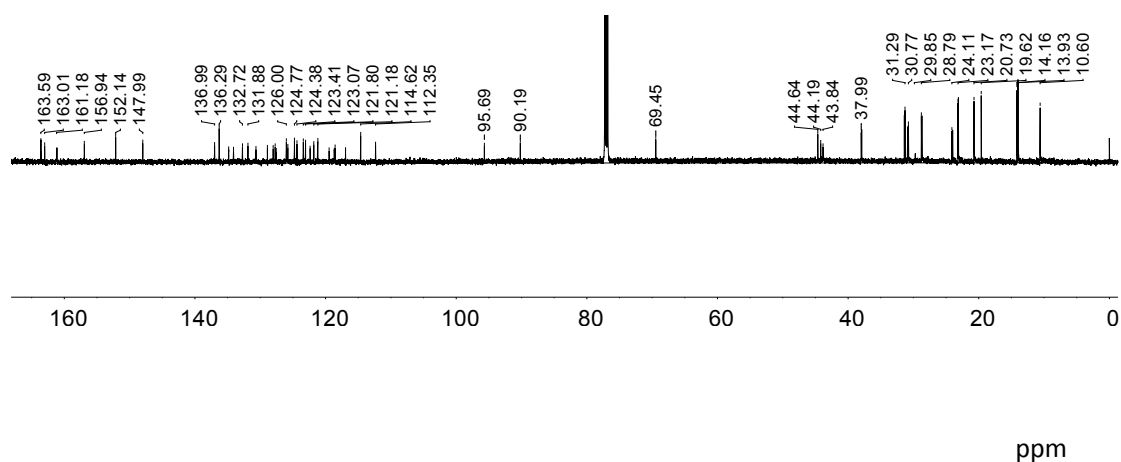

**Fig S13.**  $^{13}\text{C}$  NMR of compound **P-2** ( $\text{CDCl}_3$ , 150 MHz).

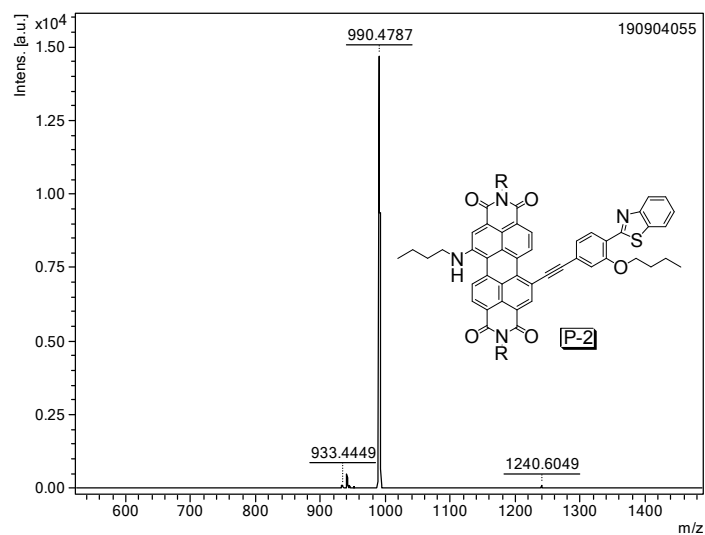

**Fig S14.** MALDI-HRMS of compound **P-2**

### 3. Photophysical Properties

**Table S1** Photophysical Properties of **P-1**, **P-2**, **7**, **9** and **HBT** <sup>a</sup>

| Comp.      | Solvents               | $\square \lambda_{\text{abs}}^b(\text{nm})/A^c$ | $\varepsilon^c(\text{M}^{-1}\text{cm}^{-1})$ | $\square \lambda_{\text{em}}^d(\text{nm})$ | Stokes shift |
|------------|------------------------|-------------------------------------------------|----------------------------------------------|--------------------------------------------|--------------|
| <b>P-1</b> | EtOAc                  | 652/0.237                                       | 23700                                        | 752                                        | 100          |
|            | $\text{CH}_3\text{CN}$ | 671/0.185                                       | 18500                                        | - <i>p</i>                                 | - <i>p</i>   |
|            | MeOH                   | 647/0.159                                       | 15900                                        | - <i>p</i>                                 | - <i>p</i>   |
| <b>P-2</b> | EtOAc                  | 651/0.210                                       | 21000                                        | 756                                        | 105          |
|            | $\text{CH}_3\text{CN}$ | 686/0.145                                       | 14500                                        | - <i>p</i>                                 | - <i>p</i>   |
|            | MeOH                   | 690/0.141                                       | 14100                                        | - <i>p</i>                                 | - <i>p</i>   |

|          |                    |           |       |     |    |
|----------|--------------------|-----------|-------|-----|----|
| <b>7</b> | EtOAc              | 518/0.820 | 82000 | 540 | 22 |
|          | CH <sub>3</sub> CN | 519/0.622 | 62200 | 541 | 22 |
|          | MeOH               | 481/0.187 | 18700 | 546 | 65 |
| <b>9</b> | EtOAc              | 632/0.220 | 22000 | 713 | 81 |
|          | CH <sub>3</sub> CN | 638/0.224 | 22400 | 726 | 88 |
|          | MeOH               | 649/0.222 | 22200 | 732 | 83 |

<sup>a</sup>The excited wavelength for compound **P-1**, **P-2**, **7** and **9** were 620 nm, 620 nm, 500 nm and 600 nm respectively ( $1.0 \times 10^{-5}$  M, 20 °C). <sup>b</sup>Absorption wavelength. <sup>c</sup> Molar extinction coefficient. <sup>d</sup>Fluorescence emission wavelength. <sup>f</sup> Absorbance. <sup>p</sup> Weak signal.

(The extinction

coefficients is calculated according to the absorbance (A) of the maximum wavelength from the UV-vis spectrum and use Lambert's law to calculate the extinction coefficients ( $\epsilon$ ))

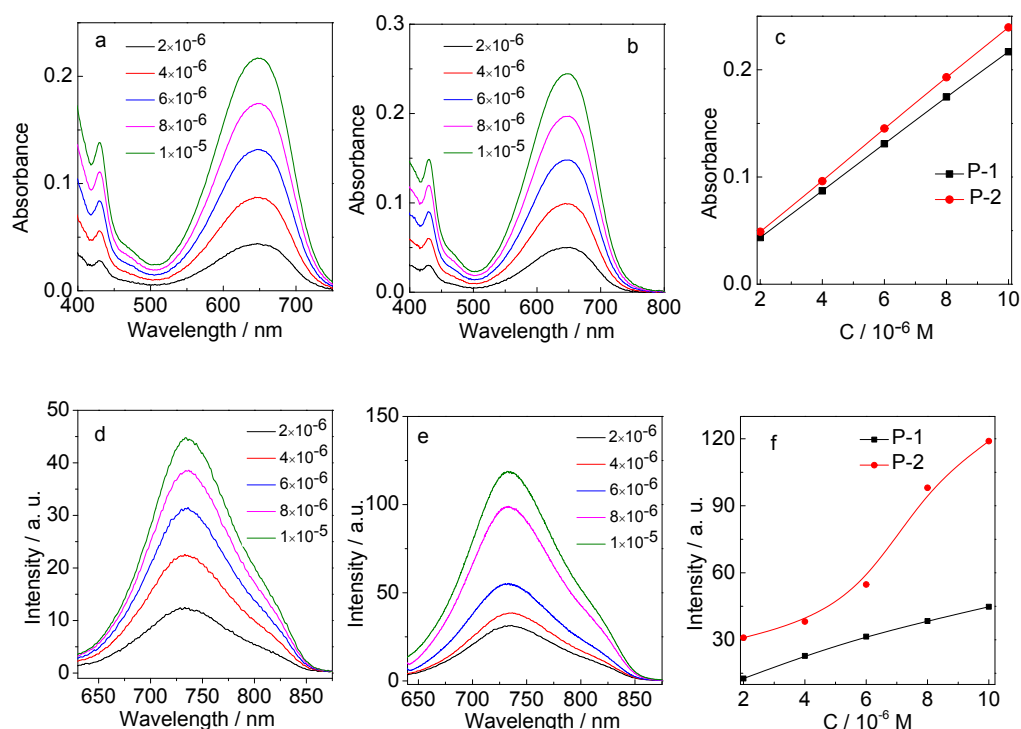

**Fig S15.** UV-Vis absorption spectra (a) **P-1**, (b) **P-2** and fluorescence emission spectra (d) **P-1**, (e) **P-2** at the different concentration. The dependence of (e) absorbance to concentration (f) fluorescence intensity to concentration for **P-1** and **P-2** in PhCH<sub>3</sub> at 20 °C.

### 3. Cyclic Voltammogram of P-1 and P-2

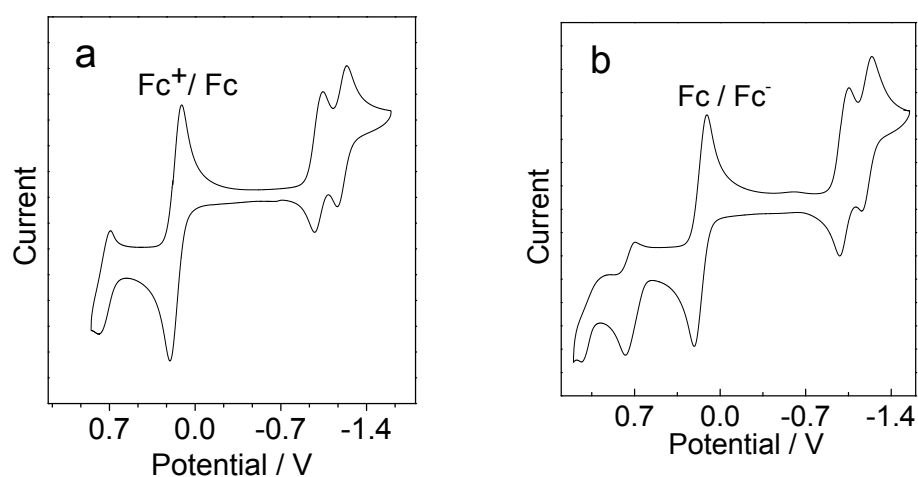

**Figure S16** Cyclic voltammetry (a) **P-1** and (b) **P-2** in  $N_2$ -saturated solvents containing 0.10 M  $Bu_4N[PF_6]$ . Pt electrode as the counter electrode, glassy carbon as the electrode working electrode, Ferrocene ( $Fc/Fc^+$ ) as the internal reference, and  $Ag/AgNO_3$  couple as the reference electrode.

### 4. DFT calculation

**Table S2.** Selected parameters for the vertical excitation (UV-vis absorption and fluorescence emission) of the compounds. Electronic excitation energies (eV) and oscillator strengths ( $f$ ), configurations of the low-lying excited states of **P-2** and its fluorescent precursors. Calculated by TDDFT//B3LYP/6-31G(d), based on the optimized ground state geometries ( $PhCH_3$  was employed as solvent in all the calculation).

|            | Electronic transition <sup>a</sup> | Excitation energy | TDDFT/B3LYP/6-31G(d) |                          |                 |
|------------|------------------------------------|-------------------|----------------------|--------------------------|-----------------|
|            |                                    |                   | $f^b$                | Composition <sup>c</sup> | CI <sup>d</sup> |
| Absorption | $S_0 \rightarrow S_1^e$            | 1.78 eV (698 nm)  | 0.6036               | H $\rightarrow$ L        | 0.7079          |

|          |                          |                  |        |                     |        |
|----------|--------------------------|------------------|--------|---------------------|--------|
|          | $S_0 \rightarrow S_7$    | 3.11 eV (399 nm) | 0.2920 | $H \rightarrow L+2$ | 0.5506 |
|          |                          |                  |        | $H \rightarrow L+3$ | 0.4283 |
|          | $S_0 \rightarrow S_{12}$ | 3.36 eV (369 nm) | 0.1451 | $H-8 \rightarrow L$ | 0.5258 |
|          |                          |                  |        | $H \rightarrow L+4$ | 0.3169 |
| Emission | $S_1 \rightarrow S_0$    | 1.60 eV (774 nm) | 0.5716 | $H \rightarrow L$   | 0.7099 |

<sup>a</sup> Only selected excited states were considered. The numbers in parentheses are the excitation energy in wavelength.

<sup>b</sup> Oscillator strength. <sup>c</sup> H stands for HOMO and L stands for LUMO. Only the main configurations are presented. <sup>d</sup>

Coefficient of the wavefunction for each excitations. The CI coefficients are in absolute values.

### Compound **7** (DFT//B3LYP/6-31G(d) )

Symbolic Z-matrix:

Charge = 0 Multiplicity = 1

|   |          |          |          |
|---|----------|----------|----------|
| C | -7.06545 | -3.84523 | -0.25588 |
| C | -5.49653 | -5.57641 | 0.56676  |
| C | -6.35562 | -2.8831  | 0.54184  |
| C | -5.29113 | -3.27463 | 1.41574  |
| C | -4.91447 | -4.65454 | 1.48865  |
| C | -4.95657 | -0.93272 | 2.07805  |
| C | -5.99431 | -0.52725 | 1.21089  |
| C | -6.69858 | -1.4915  | 0.45595  |
| C | -7.74637 | -1.07774 | -0.40522 |
| C | -8.52283 | -2.03652 | -1.07146 |
| H | -9.39586 | -1.68705 | -1.61009 |
| C | -6.44495 | -7.40569 | -1.38684 |
| C | -5.51404 | -7.84485 | -0.42353 |
| C | -5.02215 | -6.93263 | 0.54385  |
| H | -6.75443 | -8.1039  | -2.15504 |
| C | -4.04768 | -7.36259 | 1.47639  |
| C | -3.52688 | -6.45344 | 2.42152  |

|   |          |           |          |
|---|----------|-----------|----------|
| H | -2.79327 | -6.81752  | 3.13052  |
| C | -8.26425 | -3.39907  | -0.96665 |
| C | -3.93858 | -5.13889  | 2.42321  |
| H | -3.51766 | -4.46444  | 3.15682  |
| C | -4.61896 | -2.26292  | 2.18027  |
| C | -8.09398 | 0.34237   | -0.53703 |
| C | -6.32052 | 0.90192   | 1.10661  |
| O | -5.70622 | 1.77277   | 1.7688   |
| O | -9.01064 | 0.74568   | -1.29322 |
| C | -5.03403 | -9.23127  | -0.46539 |
| C | -3.56156 | -8.74876  | 1.47345  |
| N | -4.09311 | -9.61318  | 0.50395  |
| O | -2.70564 | -9.15851  | 2.29463  |
| O | -5.43989 | -10.05421 | -1.3218  |
| C | -3.61015 | -11.00677 | 0.48458  |
| H | -4.40139 | -11.63927 | 0.08624  |
| H | -2.7267  | -11.09619 | -0.15561 |
| H | -3.3412  | -11.29165 | 1.50016  |
| N | -7.3559  | 1.25778   | 0.22618  |
| C | -7.71174 | 2.68244   | 0.08811  |
| H | -7.58345 | 2.9959    | -0.95036 |
| H | -8.75825 | 2.82975   | 0.36404  |
| H | -7.05756 | 3.25131   | 0.74466  |
| C | -6.53157 | -5.17348  | -0.34291 |
| C | -6.93553 | -6.1185   | -1.35375 |
| H | -4.38595 | -0.20448  | 2.63525  |
| H | -8.97459 | -3.96167  | -1.55427 |
| H | -7.61199 | -5.80555  | -2.12146 |

H                    -3.82274   -2.5699   2.82577

Compound **9** (DFT//B3LYP/6-31G(d)/GENECP )

Symbolic Z-matrix:

Charge = 0   Multiplicity = 1

|   |          |          |          |
|---|----------|----------|----------|
| C | -0.5301  | -1.56405 | -0.0631  |
| C | 1.52518  | -0.20505 | -0.02798 |
| C | -1.31702 | -0.36396 | -0.09001 |
| C | -0.70158 | 0.93115  | 0.03076  |
| C | 0.75264  | 0.99174  | -0.18474 |
| C | -2.96013 | 1.88867  | 0.21456  |
| C | -3.54358 | 0.67264  | -0.09001 |
| C | -2.73273 | -0.47732 | -0.22679 |
| C | -3.33207 | -1.73045 | -0.49802 |
| C | -2.5328  | -2.85706 | -0.61616 |
| H | -2.99639 | -3.80518 | -0.86707 |
| C | 3.12663  | -2.45446 | 0.46954  |
| C | 3.72667  | -1.2876  | 0.06341  |
| C | 2.9421   | -0.12602 | -0.15894 |
| H | 3.75819  | -3.30813 | 0.69879  |
| C | 3.56661  | 1.0812   | -0.53537 |
| C | 2.79284  | 2.20397  | -0.78552 |
| H | 3.27544  | 3.11798  | -1.11324 |
| C | -1.15808 | -2.77718 | -0.3771  |
| C | 1.4078   | 2.15552  | -0.60461 |
| H | 0.83695  | 3.04762  | -0.81421 |
| C | -1.56756 | 2.00716  | 0.2807   |
| C | -4.79434 | -1.8432  | -0.6681  |



|    |          |          |          |
|----|----------|----------|----------|
| C  | -5.0178  | 0.59408  | -0.22298 |
| O  | -5.74021 | 1.57534  | -0.08574 |
| O  | -5.35742 | -2.90168 | -0.92778 |
| C  | 5.20473  | -1.25114 | -0.0803  |
| C  | 5.03753  | 1.14997  | -0.69853 |
| N  | 5.76536  | -0.02396 | -0.45607 |
| O  | 5.62208  | 2.17341  | -1.03274 |
| O  | 5.90352  | -2.23848 | 0.11875  |
| C  | 7.22122  | 0.06661  | -0.61996 |
| H  | 7.64285  | -0.90832 | -0.38792 |
| H  | 7.46086  | 0.3519   | -1.64708 |
| H  | 7.62199  | 0.8275   | 0.05365  |
| N  | -5.54803 | -0.66905 | -0.51813 |
| C  | -7.00028 | -0.80275 | -0.68047 |
| H  | -7.22641 | -1.18422 | -1.67892 |
| H  | -7.39212 | -1.50801 | 0.05637  |
| H  | -7.44226 | 0.18041  | -0.53821 |
| N  | 1.23286  | -3.73906 | 1.15659  |
| H  | 1.96415  | -4.41734 | 1.32531  |
| C  | 0.1634   | -3.78629 | 2.15386  |
| H  | 0.40598  | -4.56412 | 2.88178  |
| H  | 0.07585  | -2.82816 | 2.67849  |
| H  | -0.81153 | -4.01894 | 1.71201  |
| C  | 0.90067  | -1.47011 | 0.22101  |
| C  | 1.71784  | -2.56031 | 0.61833  |
| H  | -3.59823 | 2.74731  | 0.38364  |
| H  | -0.55699 | -3.67594 | -0.44663 |
| Br | -0.97086 | 3.79962  | 0.88302  |

Compound **P-1** (DFT//B3LYP/6-31G(d) )

Symbolic Z-matrix:

Charge = 0 Multiplicity = 1

|   |          |          |          |
|---|----------|----------|----------|
| C | -7.06545 | -3.84523 | -0.25588 |
| C | -5.49653 | -5.57641 | 0.56676  |
| C | -6.35562 | -2.8831  | 0.54184  |
| C | -5.29113 | -3.27463 | 1.41574  |
| C | -4.91447 | -4.65454 | 1.48865  |
| C | -4.95657 | -0.93272 | 2.07805  |
| C | -5.99431 | -0.52725 | 1.21089  |
| C | -6.69858 | -1.4915  | 0.45595  |
| C | -7.74637 | -1.07774 | -0.40522 |
| C | -8.52283 | -2.03652 | -1.07146 |
| H | -9.39586 | -1.68705 | -1.61009 |
| C | -6.44495 | -7.40569 | -1.38684 |
| C | -5.51404 | -7.84485 | -0.42353 |
| C | -5.02215 | -6.93263 | 0.54385  |
| H | -6.75443 | -8.1039  | -2.15504 |
| C | -4.04768 | -7.36259 | 1.47639  |
| C | -3.52688 | -6.45344 | 2.42152  |
| H | -2.79327 | -6.81752 | 3.13052  |
| C | -8.26425 | -3.39907 | -0.96665 |
| C | -3.93858 | -5.13889 | 2.42321  |
| H | -3.51766 | -4.46444 | 3.15682  |
| C | -4.61896 | -2.26292 | 2.18027  |
| C | -8.09398 | 0.34237  | -0.53703 |
| C | -6.32052 | 0.90192  | 1.10661  |

|   |          |           |          |
|---|----------|-----------|----------|
| O | -5.70622 | 1.77277   | 1.7688   |
| O | -9.01064 | 0.74568   | -1.29322 |
| C | -5.03403 | -9.23127  | -0.46539 |
| C | -3.56156 | -8.74876  | 1.47345  |
| N | -4.09311 | -9.61318  | 0.50395  |
| O | -2.70564 | -9.15851  | 2.29463  |
| O | -5.43989 | -10.05421 | -1.3218  |
| C | -3.61015 | -11.00677 | 0.48458  |
| H | -4.40139 | -11.63927 | 0.08624  |
| H | -2.7267  | -11.09619 | -0.15561 |
| H | -3.3412  | -11.29165 | 1.50016  |
| N | -7.3559  | 1.25778   | 0.22618  |
| C | -7.71174 | 2.68244   | 0.08811  |
| H | -7.58345 | 2.9959    | -0.95036 |
| H | -8.75825 | 2.82975   | 0.36404  |
| H | -7.05756 | 3.25131   | 0.74466  |
| C | -6.53157 | -5.17348  | -0.34291 |
| C | -6.93553 | -6.1185   | -1.35375 |
| H | -4.38595 | -0.20448  | 2.63525  |
| H | -8.97459 | -3.96167  | -1.55427 |
| H | -7.61199 | -5.80555  | -2.12146 |
| H | -3.82274 | -2.5699   | 2.82577  |

Compound **P-2** (DFT//B3LYP/6-31G(d) )

Symbolic Z-matrix:

Charge = 0 Multiplicity = 1

|   |          |          |          |
|---|----------|----------|----------|
| C | -7.06545 | -3.84523 | -0.25588 |
| C | -5.49653 | -5.57641 | 0.56676  |

|   |          |          |          |
|---|----------|----------|----------|
| C | -6.35562 | -2.8831  | 0.54184  |
| C | -5.29113 | -3.27463 | 1.41574  |
| C | -4.91447 | -4.65454 | 1.48865  |
| C | -4.95657 | -0.93272 | 2.07805  |
| C | -5.99431 | -0.52725 | 1.21089  |
| C | -6.69858 | -1.4915  | 0.45595  |
| C | -7.74637 | -1.07774 | -0.40522 |
| C | -8.52283 | -2.03652 | -1.07146 |
| H | -9.39586 | -1.68705 | -1.61009 |
| C | -6.44495 | -7.40569 | -1.38684 |
| C | -5.51404 | -7.84485 | -0.42353 |
| C | -5.02215 | -6.93263 | 0.54385  |
| H | -6.75443 | -8.1039  | -2.15504 |
| C | -4.04768 | -7.36259 | 1.47639  |
| C | -3.52688 | -6.45344 | 2.42152  |
| H | -2.79327 | -6.81752 | 3.13052  |
| C | -8.26425 | -3.39907 | -0.96665 |
| C | -3.93858 | -5.13889 | 2.42321  |
| H | -3.51766 | -4.46444 | 3.15682  |
| C | -4.61896 | -2.26292 | 2.18027  |
| C | -8.09398 | 0.34237  | -0.53703 |
| C | -6.32052 | 0.90192  | 1.10661  |
| O | -5.70622 | 1.77277  | 1.7688   |
| O | -9.01064 | 0.74568  | -1.29322 |
| C | -5.03403 | -9.23127 | -0.46539 |
| C | -3.56156 | -8.74876 | 1.47345  |
| N | -4.09311 | -9.61318 | 0.50395  |
| O | -2.70564 | -9.15851 | 2.29463  |

|   |          |           |          |
|---|----------|-----------|----------|
| O | -5.43989 | -10.05421 | -1.3218  |
| C | -3.61015 | -11.00677 | 0.48458  |
| H | -4.40139 | -11.63927 | 0.08624  |
| H | -2.7267  | -11.09619 | -0.15561 |
| H | -3.3412  | -11.29165 | 1.50016  |
| N | -7.3559  | 1.25778   | 0.22618  |
| C | -7.71174 | 2.68244   | 0.08811  |
| H | -7.58345 | 2.9959    | -0.95036 |
| H | -8.75825 | 2.82975   | 0.36404  |
| H | -7.05756 | 3.25131   | 0.74466  |
| C | -6.53157 | -5.17348  | -0.34291 |
| C | -6.93553 | -6.1185   | -1.35375 |
| H | -4.38595 | -0.20448  | 2.63525  |
| H | -8.97459 | -3.96167  | -1.55427 |
| H | -7.61199 | -5.80555  | -2.12146 |
| H | -3.82274 | -2.5699   | 2.82577  |
